# Supplementary material for: Trifloroside Induces Bioactive Effects on Differentiation, Adhesion, Migration, and Mineralization in Pre-Osteoblast MC3T3E-1 Cells
Source: MDPI journal article supplement (doi:10.3390/cells11233887), 2022-12-01

## Supplementary Figure Legend

- **Supplementary Figure S1.** NMR spectra of TriFs from *Gentianae Scabrae Radix* roots . **(A, B)**  $^{13}\text{C}$  NMR spectrum (A) and  $^1\text{H}$  NMR spectrum (B)
- **Supplementary Figure S2.** Effects of TriFs on cell viability in pre-osteoblasts. Cell viability was detected by BrdU incorporation assay. Data shown are from three independent trials.

A

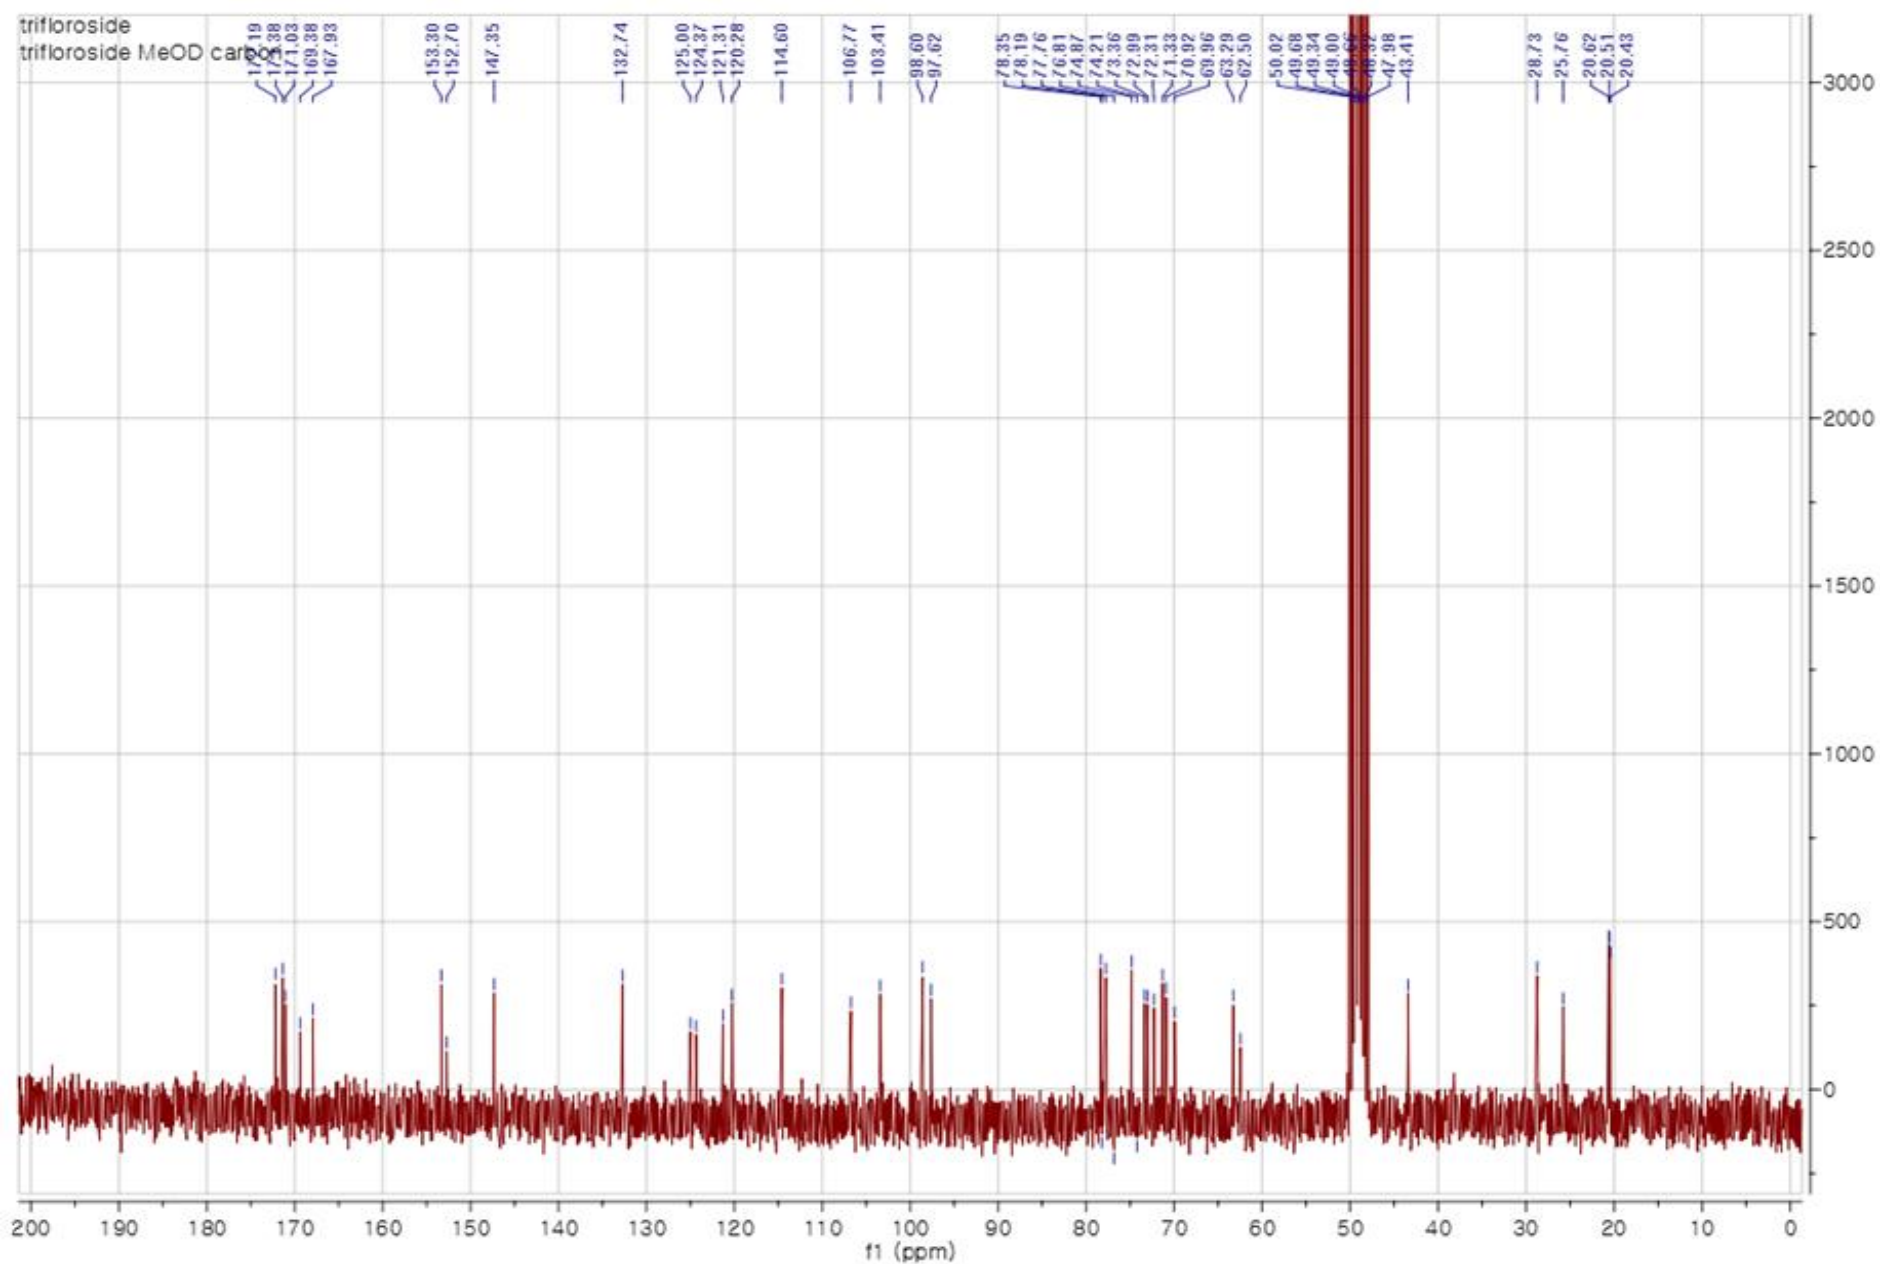

B

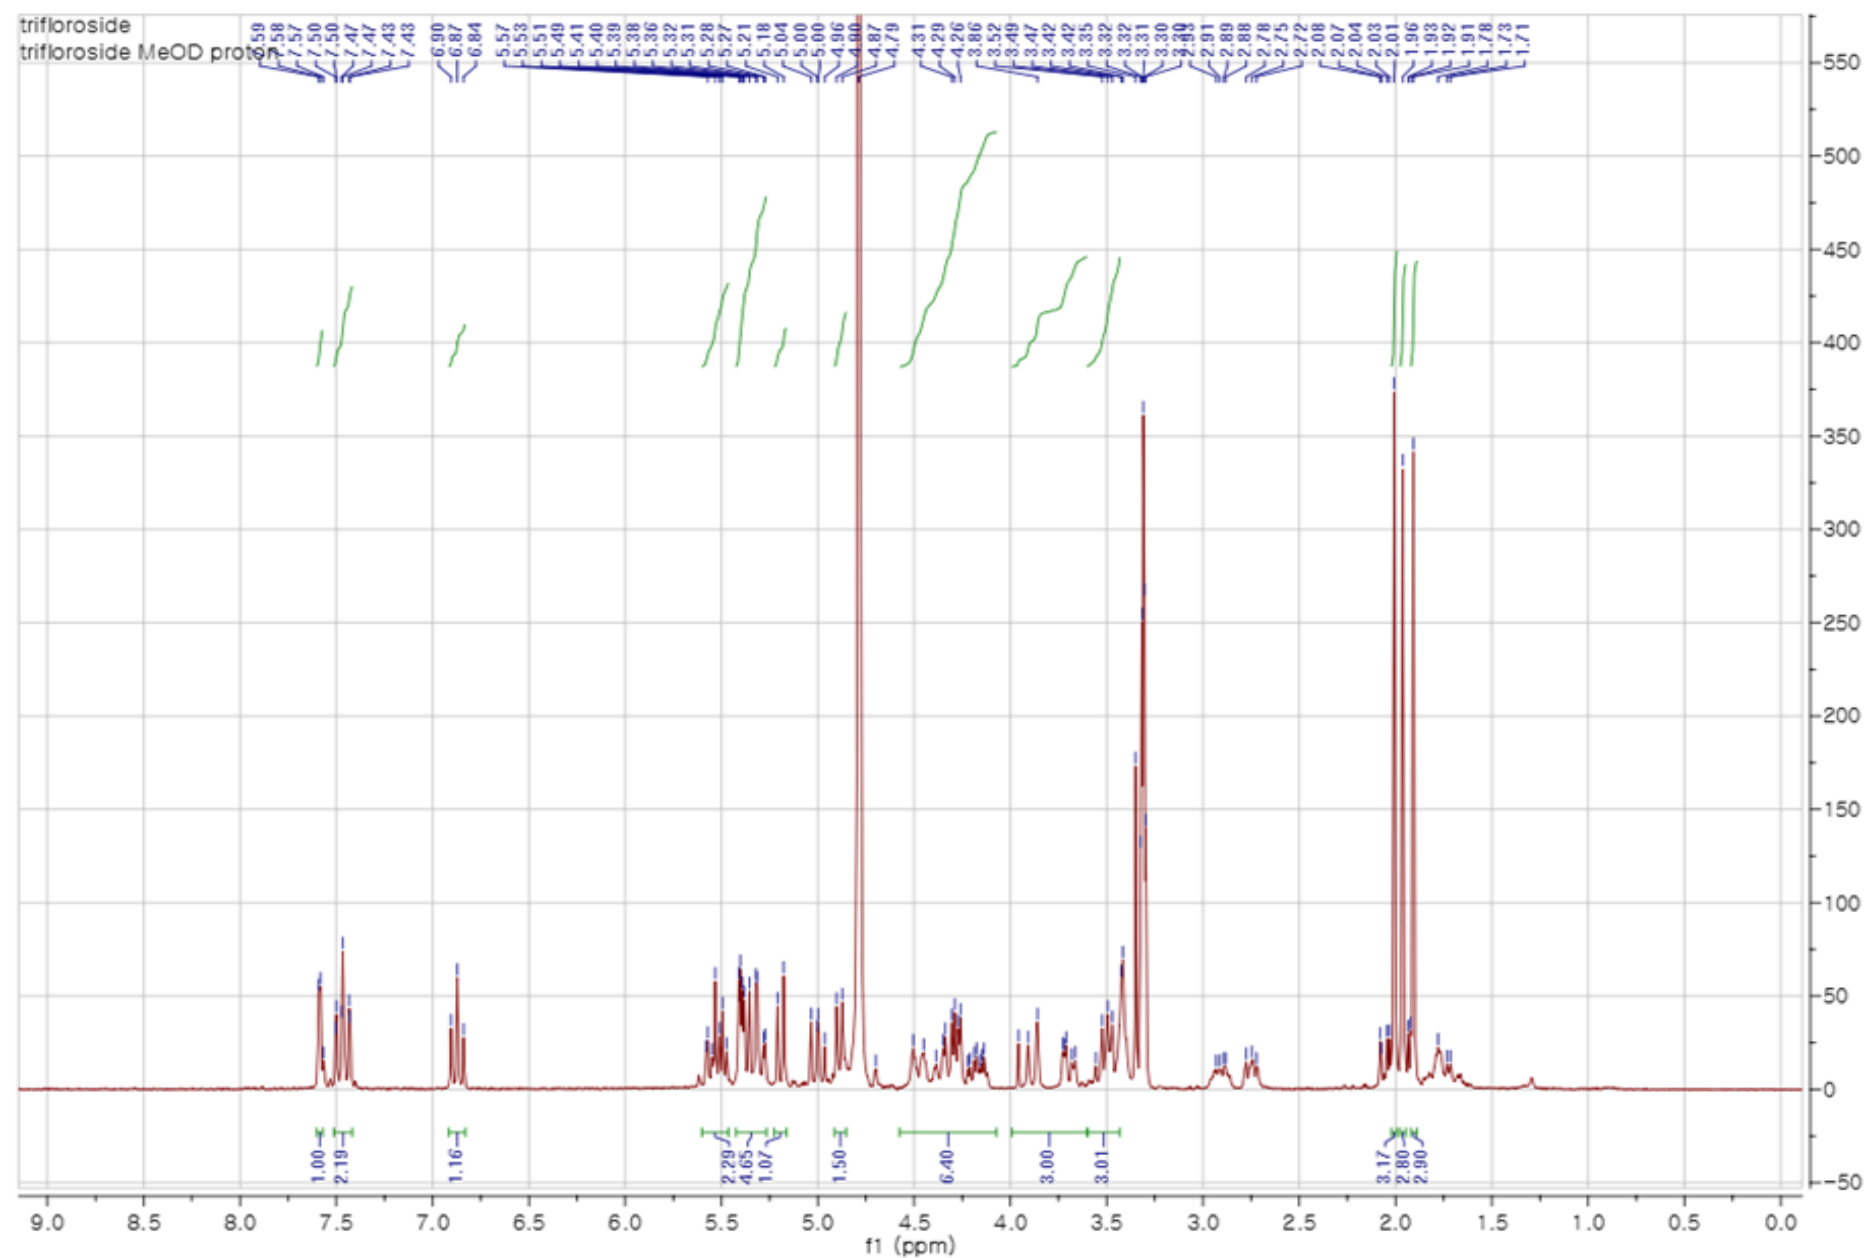

**Supplementary  
Fig. S2**

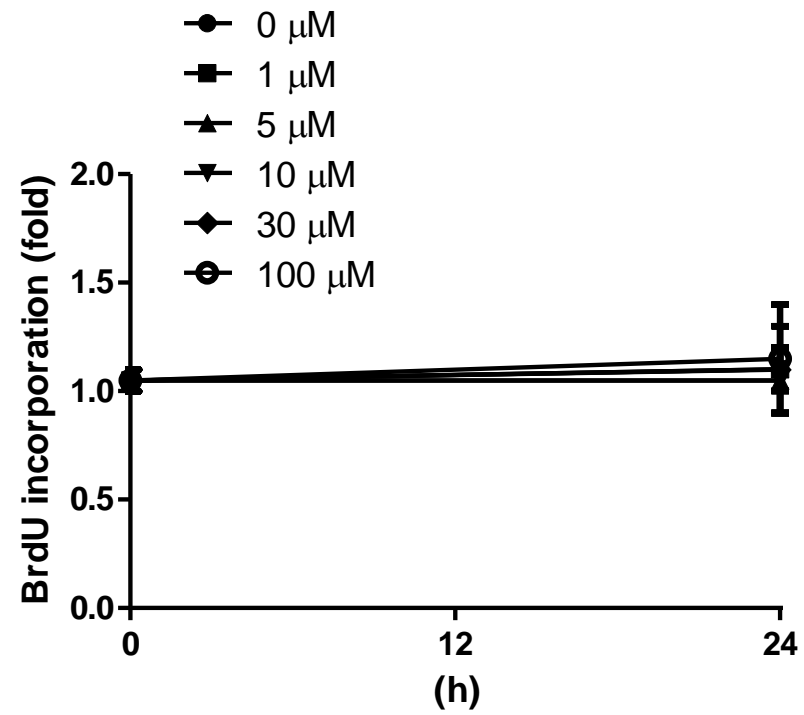

Supplement: s1 [file s1]
